# Supplementary material
Source: PubMed Central journal article supplement (PMC3122784)
Supplement: supp_49_4_1594__1.pdf [file supp_49_4_1594__1.pdf]

Supplementary table 1. PCR primers for the pO157\_Sal plasmid screening.

| Primer | Target gene | Sequence (5'-3')     | Amplicon size (bp) |
|--------|-------------|----------------------|--------------------|
| p206-F | <i>traA</i> | TGCCCCCTGCGGCGTTAGTA | 876                |
| p206-R |             | TTGCCAACGCAGCCGCTGAT |                    |
| p215-F | <i>traE</i> | TGATGCGGCAAGTGCACAA  | 547                |
| p215-R |             | AGCGCGGCGAGATGCTTGAG |                    |
| p228-F | <i>mpr</i>  | CCGTCACGTTTTGCGGGGA  | 598                |
| p228-R |             | CGCTAGGTTTCGCCACGCT  |                    |
| p247-F | <i>traL</i> | AGCGCATCGCTACAAGCACA | 481                |
| p247-R |             | ACGACAACCCACCGAGGCT  |                    |

Supplementary table 2. pO157\_Sal genes.

| locus_tag    | start | end   | gene name   | function                                           | homology to Salmonella strain SL483 plasmid (% amino acid identity) |
|--------------|-------|-------|-------------|----------------------------------------------------|---------------------------------------------------------------------|
| pO157_Sal_01 | 1     | 1065  | <i>repA</i> | plasmid replication protein RepA                   | 97.46                                                               |
| pO157_Sal_02 | 1066  | 1569  |             | hypothetical protein                               | 98.80                                                               |
| pO157_Sal_03 | 1774  | 2190  |             | hypothetical protein                               | 99.26                                                               |
| pO157_Sal_04 | 2284  | 2961  | <i>traB</i> | Conjugal transfer protein TraB                     | 99.11                                                               |
| pO157_Sal_05 | 2976  | 3293  | <i>traC</i> | conjugal transfer protein TraC                     | 99.05                                                               |
| pO157_Sal_06 | 3354  | 3752  | <i>traD</i> | conjugal transfer protein TraD                     | 100.00                                                              |
| pO157_Sal_07 | 3697  | 6240  | <i>traE</i> | Conjugal transfer protein TraE                     | 99.17                                                               |
| pO157_Sal_08 | 6008  | 6904  | <i>traF</i> | conjugal transfer protein TraF                     | 100.00                                                              |
| pO157_Sal_09 | 6963  | 7127  |             | hypothetical protein                               | 100.00                                                              |
| pO157_Sal_10 | 7129  | 7920  | <i>traG</i> | Conjugal transfer protein TraG                     | 97.72                                                               |
| pO157_Sal_11 | 7941  | 8729  | <i>traH</i> | Conjugal transfer protein TraH                     | 100.00                                                              |
| pO157_Sal_12 | 8722  | 9948  | <i>traI</i> | Conjugal transfer protein TraI                     | 98.77                                                               |
| pO157_Sal_13 | 10025 | 11086 | <i>traJ</i> | Conjugal transfer protein TraJ                     | 99.43                                                               |
| pO157_Sal_14 | 11108 | 13129 | <i>traK</i> | Conjugal transfer protein TraK                     | 97.62                                                               |
| pO157_Sal_15 | 13145 | 13510 | <i>traR</i> | conjugal transfer protein TraR                     | 95.04                                                               |
| pO157_Sal_16 | 13596 | 13982 |             | hypothetical protein                               | 47.66                                                               |
| pO157_Sal_17 | 13873 | 16197 | <i>topB</i> | DNA topoisomerase III                              | 98.62                                                               |
| pO157_Sal_18 | 16295 | 16717 | <i>stpA</i> | DNA binding protein,<br>nucleoid-associated        | 97.86                                                               |
| pO157_Sal_19 | 16730 | 17074 |             | hypothetical protein                               | 91.07                                                               |
| pO157_Sal_20 | 17071 | 17382 |             | hypothetical protein                               | unique                                                              |
| pO157_Sal_21 | 17597 | 18415 | <i>mpr</i>  | zinc metalloproteinase Mpr<br>protein              | 98.90                                                               |
| pO157_Sal_22 | 18399 | 18986 |             | hypothetical protein                               | 94.71                                                               |
| pO157_Sal_23 | 18997 | 19200 |             | hypothetical protein                               | 100.00                                                              |
| pO157_Sal_24 | 19443 | 19784 |             | hypothetical protein                               | 97.35                                                               |
| pO157_Sal_25 | 19806 | 20021 |             | hypothetical protein                               | 97.18                                                               |
| pO157_Sal_26 | 20021 | 20521 | <i>yeaA</i> | nuclease                                           | 96.99                                                               |
| pO157_Sal_27 | 20527 | 20835 |             | hypothetical protein                               | 96.15                                                               |
| pO157_Sal_28 | 20961 | 21248 |             | hypothetical protein                               | 97.89                                                               |
| pO157_Sal_29 | 21290 | 21583 |             | hypothetical protein                               | unique                                                              |
| pO157_Sal_30 | 21638 | 22081 |             | hypothetical protein                               | 89.80                                                               |
| pO157_Sal_31 | 22078 | 22485 |             | hypothetical protein                               | 74.05                                                               |
| pO157_Sal_32 | 22486 | 22689 | <i>hha</i>  | Haemolysin expression<br>modulating family protein | 95.52                                                               |
| pO157_Sal_33 | 22708 | 23118 |             | hypothetical protein                               | unique                                                              |
| pO157_Sal_34 | 23161 | 23406 |             | hypothetical protein                               | 46.15                                                               |
| pO157_Sal_35 | 23842 | 24003 |             | hypothetical protein                               | 98.11                                                               |
| pO157_Sal_36 | 24245 | 24457 |             | hypothetical protein                               | 98.57                                                               |

|              |       |       |             |                                |        |
|--------------|-------|-------|-------------|--------------------------------|--------|
| pO157_Sal_37 | 28374 | 24763 | <i>nikB</i> | relaxase                       | 98.08  |
| pO157_Sal_38 | 27383 | 27072 | <i>nikC</i> | relaxosome accessory protein   | 98.06  |
| pO157_Sal_39 | 28807 | 28349 | <i>nikA</i> | Relaxosome component           | 96.12  |
| pO157_Sal_40 | 29094 | 29507 |             | hypothetical protein           | 57.35  |
| pO157_Sal_41 | 29510 | 30322 | <i>traL</i> | Conjugal transfer protein TraL | 98.51  |
| pO157_Sal_42 | 30370 | 30927 |             | hypothetical protein           | 100.00 |
| pO157_Sal_43 | 30960 | 31313 |             | hypothetical protein           | 88.03  |
| pO157_Sal_44 | 31653 | 31348 |             | hypothetical protein           | unique |
| pO157_Sal_45 | 32258 | 31656 |             | hypothetical protein           | 95.50  |
| pO157_Sal_46 | 33393 | 32398 |             | hypothetical protein           | 100.00 |
| pO157_Sal_47 | 33842 | 33516 |             | hypothetical protein           | 100.00 |
| pO157_Sal_48 | 34096 | 33941 |             | hypothetical protein           | 98.04  |
| pO157_Sal_49 | 34646 | 34323 |             | hypothetical protein           | 98.82  |
| pO157_Sal_50 | 35259 | 34678 |             | hypothetical protein           | 97.93  |
| pO157_Sal_51 | 36424 | 35372 | <i>traA</i> | Conjugal transfer protein TraA | 98.86  |
| pO157_Sal_52 | 36692 | 36444 |             | hypothetical protein           | 100.00 |

---

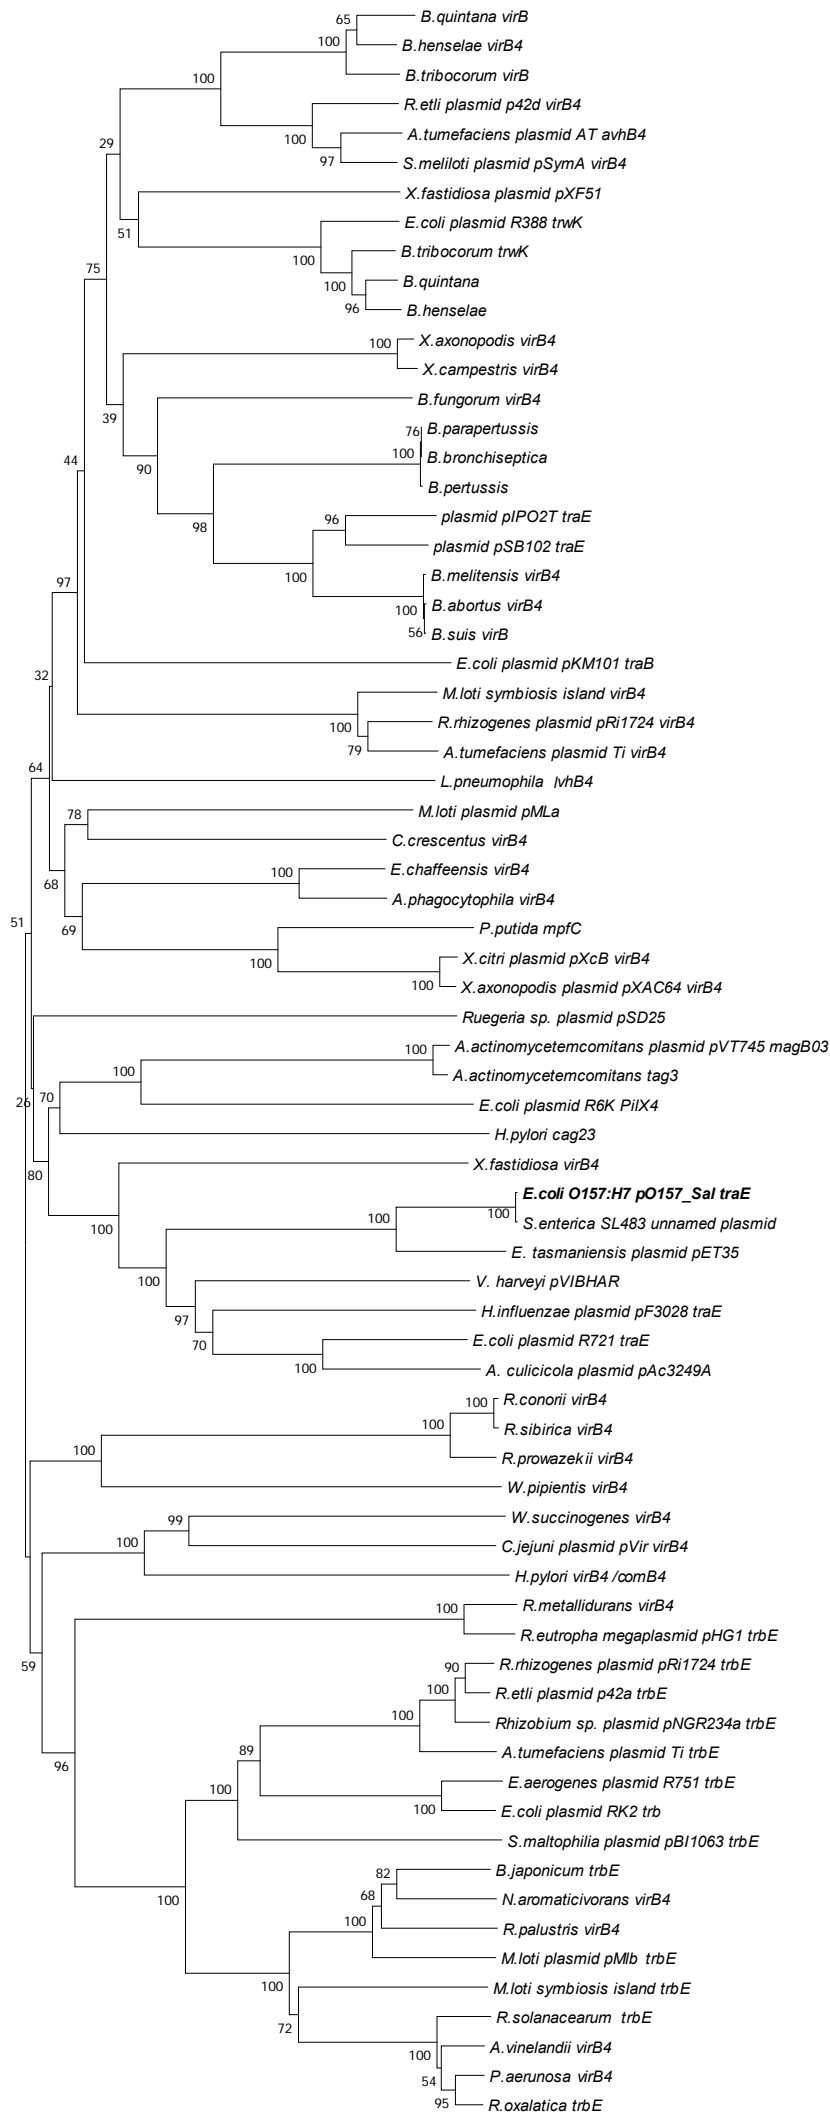

0.1

Supplementary figure 1. TraE tree

The Genbank accession No. and protein sequences of TraE are described by Frank et al and download from [http://www.egs.uu.se/molev/sup\\_data.html](http://www.egs.uu.se/molev/sup_data.html). Other Genbank accession No. are *Erwinia tasmaniensis* plasmid pET35 (YP\_001909403), (YP\_002268522), *Aeromonas culicicola* plasmid pAc3249A (ABI83640), *Vibrio harveyi* pVIBHAR (YP\_001436080).

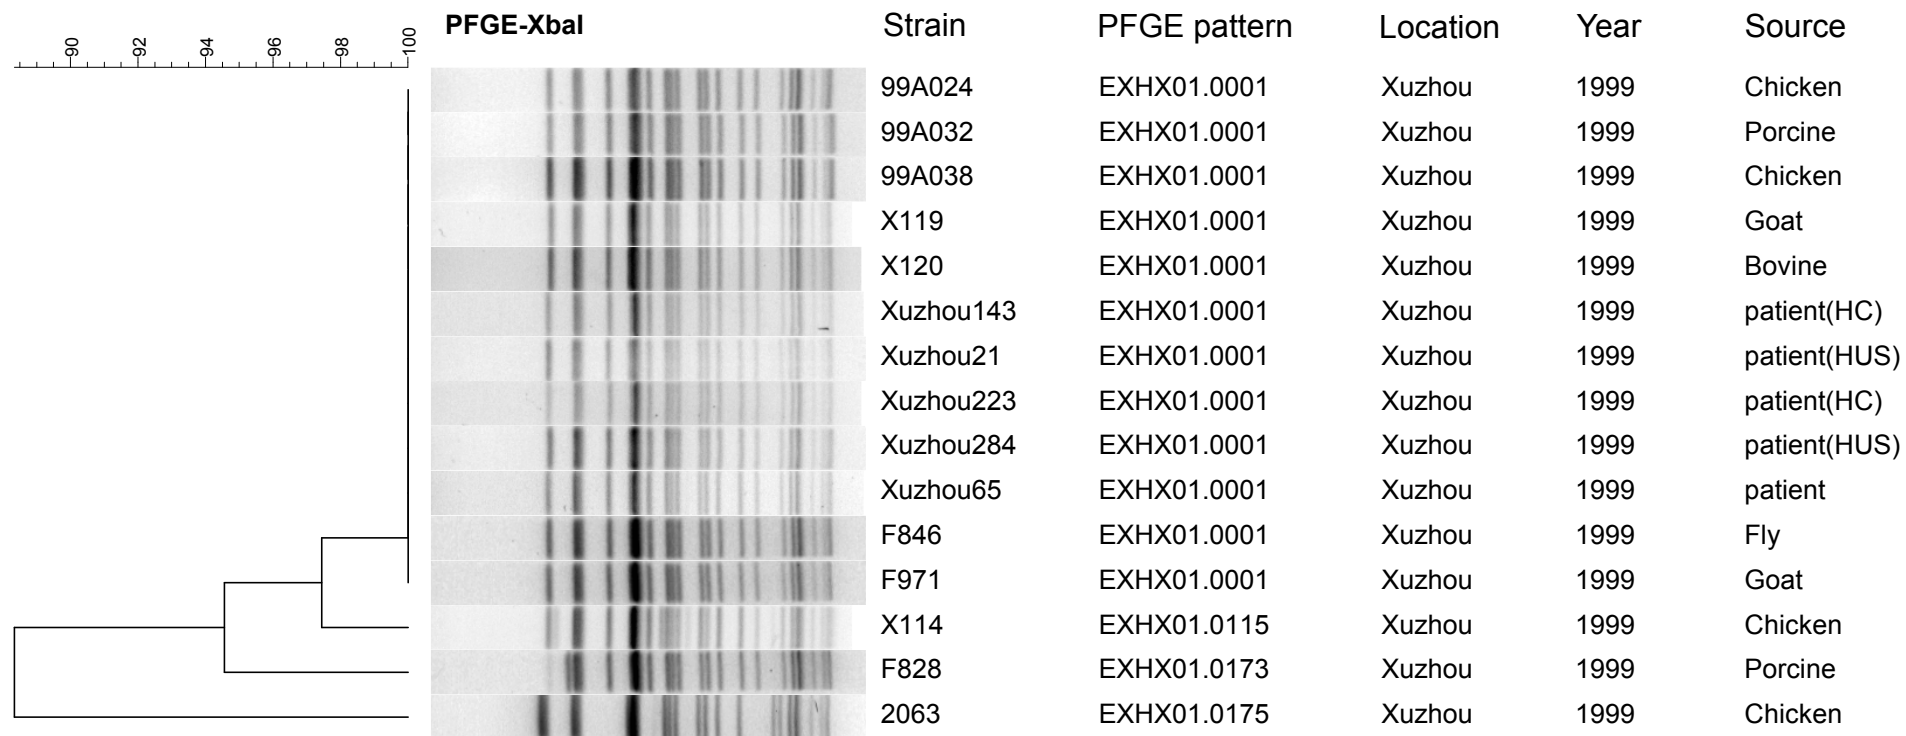

Supplementary figure 2. Pulsed-field gel electrophoresis (PFGE) type of pO157\_Sal positive strains.
